# Supplementary material for: A Case of NAA10-related Syndrome With Prolonged QTc Treated With a Subcutaneous Implantable Cardioverter Defibrillator After Ventricular Fibrillation
Source: PubMed Central journal article supplement (PMC10642139; doi:10.1016/j.cjcpc.2022.10.001), 2022-10-07
Supplement: mmc1.pdf [file mmc1.pdf]

1 **Supplemental Fig. S1**

2 Ventricular fibrillation detected on the electrocardiogram monitor.

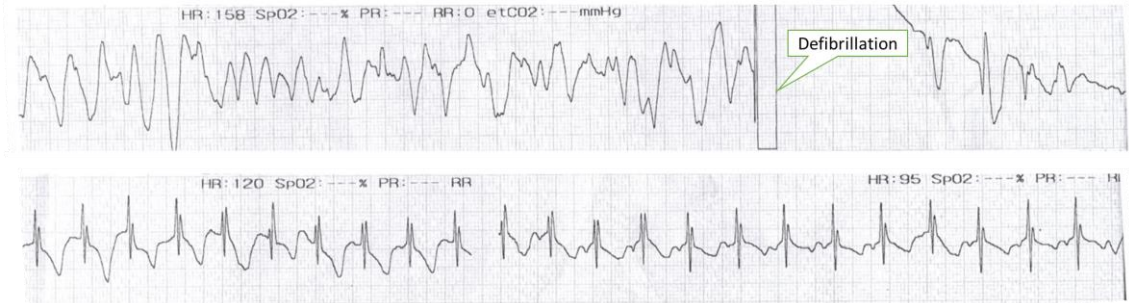

3

4
